# Supplementary material
Source: Copernicus journal article supplement (doi:10.5194/cp-22-1003-2026)
Supplement: Supplementary file [file cp-22-1003-2026-supplement-title-page.pdf › cp-22-1003-2026-supplement-title-page.pdf]

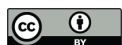

## *Supplement of*

# **Spatially contrasted response of Devonian anoxia to astronomical forcing**

**Justin Gérard et al.**

*Correspondence to:* Justin Gérard ([justin.gerard@uclouvain.be](mailto:justin.gerard@uclouvain.be))

- [cp-22-1003-2026-supplement-title-page.pdf](#)
- [oxygen\\_anomaly\\_with\\_anoxia\\_contours\\_and\\_AF\\_slower.mp4](#)

The copyright of individual parts of the supplement might differ from the article licence.
